# Supplementary material
Source: Research Square preprint supplement (doi:10.21203/rs.3.rs-8888424/v1)
Supplement: Supplementary file 1 [file 35286044984512c0d72162b3.xlsx]

## Sheet: CleanPre
Unique ID	Q1	Q2	Q3	Pain Score_1	Stiffness_1	Pain_1	Pain_2	Pain_3	Pain_4	Function_1	Function_2			LEGEND KOOS
	Email	Date	Gender	How would you rate the pain in your knee right now? - Please select:	In the last week, how severe is your knee stiffness after first wakening in the morning? - Please select:	What amount of knee pain have you experienced in the last week during the following activities? - Twisting / Pivoting on your knee	What amount of knee pain have you experienced in the last week during the following activities? - Straightening knee fully	What amount of knee pain have you experienced in the last week during the following activities? - Going up or down stairs	What amount of knee pain have you experienced in the last week during the following activities? - Standing upright	The following questions concern your physical function. By this we mean your ability to move around and to look after yourself. For each of the following activities please indicate the degree of difficulty you have experienced in the last week due to your knee. - Rising from sitting	The following questions concern your physical function. By this we mean your ability to move around and to look after yourself. For each of the following activities please indicate the degree of difficulty you have experienced in the last week due to your knee. - Bending to floor / Pick up an object			Response	Score
	{"ImportId":"QID14_TEXT"}	{"ImportId":"QID16_TEXT"}	{"ImportId":"QID15"}	{"ImportId":"QID6_24"}	{"ImportId":"QID1_1"}	{"ImportId":"QID3_1"}	{"ImportId":"QID3_2"}	{"ImportId":"QID3_3"}	{"ImportId":"QID3_4"}	{"ImportId":"QID4_1"}	{"ImportId":"QID4_2"}			None	0
00001			Female	0 - No Pain	Moderate	Severe	Moderate	Mild	Mild	Severe	Severe			Mild	1
00002			Female	6	Moderate	Moderate	Mild	Severe	Moderate	None	None			Moderate	2
00003			Female	7	Moderate	Severe	Moderate	Moderate	Mild	Moderate	Mild			Severe	3
00004			Male	5	Moderate	Severe	Moderate	Severe	Mild	Moderate	Moderate			Extreme	4
00005			Female	10 - Worst Pain Possible	Extreme	Extreme	Moderate	Severe	Moderate	Severe	Severe
00006			Female	4	Moderate	Moderate	Severe	Moderate	Moderate	Mild	Mild
00007			Female	4	Moderate	Moderate	Mild	Moderate	Moderate	Mild	Mild
00008			Male	2	Severe	Moderate	Moderate	Moderate	Moderate	Moderate	Moderate
00009			Female	4	Severe	Moderate	Moderate	Severe	Mild	Moderate	Moderate
00010			Male	5	Severe	Severe	Severe	Moderate	Severe	Severe	Severe
00011			Male	1	Mild	Mild	None	Moderate	None	Moderate	Mild
00012			Female	5	Moderate	Moderate	Mild	Severe	Mild	Moderate	Moderate
00013			Female	3	Moderate	Mild	Mild	Moderate	Mild	Mild	Mild
00014			Female	7	Severe	Severe	Moderate	Severe	Moderate	Moderate	Moderate
00015			Male	5	Severe	Moderate	Moderate	Severe	Mild	Moderate	Moderate
00016			Female	3	Severe	Severe	Moderate	Moderate	Severe	Severe	Severe
00017			Female	5	Severe	Severe	Moderate	Severe	Moderate	Severe	Moderate
00018			Male	6	Extreme	Moderate	Moderate	Moderate	Moderate	Severe	Moderate
00019			Female	2	None	Mild	Mild	Moderate	Mild	Mild	Moderate
00020			Male	4	Moderate	Moderate	Moderate	Severe	Moderate	Moderate	Mild
00021			Female	4	Mild	None	Moderate	Mild	None	None	None
00022			Female	10 - Worst Pain Possible	Extreme	Extreme	Extreme	Extreme	Extreme	Extreme	Extreme
00023			Female	3	Moderate	Mild	Mild	Mild	Mild	Moderate	Moderate
00024			Female	3	Moderate	Moderate	Mild	Moderate	Moderate	Moderate	Severe
00025			Female	7	Moderate	Severe	Mild	Moderate	Mild	Moderate	Severe

## Sheet: CleanPost
Unique ID	Q1	Q3	Pain Score_1	Stiffness_1	Pain_1	Pain_2	Pain_3	Pain_4	Function_1	Function_2				LEGEND KOOS
	Email	Gender	How would you rate the pain in your knee right now? - Please select:	In the last week, how severe is your knee stiffness after first wakening in the morning? - Please select:	What amount of knee pain have you experienced in the last week during the following activities? - Twisting / Pivoting on your knee	What amount of knee pain have you experienced in the last week during the following activities? - Straightening knee fully	What amount of knee pain have you experienced in the last week during the following activities? - Going up or down stairs	What amount of knee pain have you experienced in the last week during the following activities? - Standing upright	The following questions concern your physical function. By this we mean your ability to move around and to look after yourself. For each of the following activities please indicate the degree of difficulty you have experienced in the last week due to your knee. - Rising from sitting	The following questions concern your physical function. By this we mean your ability to move around and to look after yourself. For each of the following activities please indicate the degree of difficulty you have experienced in the last week due to your knee. - Bending to floor / Pick up an object				Response	Score
		{"ImportId":"QID9"}	{"ImportId":"QID6_24"}	{"ImportId":"QID1_1"}	{"ImportId":"QID3_1"}	{"ImportId":"QID3_2"}	{"ImportId":"QID3_3"}	{"ImportId":"QID3_4"}	{"ImportId":"QID4_1"}	{"ImportId":"QID4_2"}				None	0
00004		Male	1	Mild	Mild	Mild	Moderate	None	Mild	None				Mild	1
00007		Female	2	Mild	Mild	Mild	Mild	None	None	None				Moderate	2
00020		Male	1	Mild	Mild	Mild	Mild	Mild	Mild	Mild				Severe	3
00013		Female	2	Moderate	Mild	None	Mild	Mild	Mild	Mild				Extreme	4
00005		Female	1	Moderate	Moderate	Moderate	Moderate	Moderate	Moderate	Severe
00015		Male	3	Mild	None	Mild	Mild	Mild	Mild	Mild
00019		Female	2	Mild	Mild	Mild	Mild	Mild	Mild	Moderate
00006		Female	1	None	Mild	None	Mild	None	Mild	None
00018		Male	2	Moderate	Moderate	Mild	Moderate	Moderate	Moderate	Moderate
00008		Male	6	Moderate	Severe	Moderate	Mild	Moderate	Moderate	Mild
00009		Female	1	Mild	Mild	Mild	Moderate	None	Moderate	Mild
00016		Female	1	Mild	Mild	Mild	Mild	Mild	Mild	Mild
00024		Female	2	Mild	None	None	Mild	None	None	None
00011		Male	0	Mild	Mild	None	None	None	Mild	None
00010		Male	5	Moderate	Moderate	Moderate	Severe	Moderate	Severe	Extreme
00022		Female	1	Mild	Mild	Mild	Mild	None	None	None

## Sheet: Analyses
Pre KOOS JR Calculations																											LEGEND KOOS					Table 1. KOOS JR scores pre- and post-intervention
Pre_RowIndex	Pre_ID	Pre_Email	Pre_Gender	Weight	Height	Age	PainScore_0_10_Pre	Stiffness_1	Pain_1	Pain_2	Pain_3	Pain_4	Function_1	Function_2	KOOSJR_Raw_Pre	KOOSJR_0_100_Pre	KOOSJR_0_100_Post_for_ID	Delta_PostMinusPre	Pain Delta			Pre KOOS JR (0-100) Summary					Response	Score				Timepoint	n	Mean KOOS JR (0–100)	SD
1	00001		Female	141	65	82	0	Moderate	Severe	Moderate	Mild	Mild	Severe	Severe	15	46.4286						n	25				None	0				Pre-intervention	25	49.2857	17.8274
2	00002		Female	158	64	61	6	Moderate	Moderate	Mild	Severe	Moderate	None	None	10	64.2857						Mean	49.2857				Mild	1				Post-intervention	16	72.3214	16.6752
3	00003		Female	136	66	62	7	Moderate	Severe	Moderate	Moderate	Mild	Moderate	Mild	13	53.5714						SD	17.8274				Moderate	2
4	00004		Male	183	70	57	5	Moderate	Severe	Moderate	Severe	Mild	Moderate	Moderate	15	46.4286	78.5714	32.1429	1	-4							Severe	3				Table 2. KOOS JR scores for patients with both pre- and post-intervention data
5	00005		Female	189	65	75	10	Extreme	Extreme	Moderate	Severe	Moderate	Severe	Severe	21	25	46.4286	21.4286	1	-9		Post KOOS JR (0-100) Summary					Extreme	4				Metric	Value
6	00006		Female	141	65	49	4	Moderate	Moderate	Severe	Moderate	Moderate	Mild	Mild	13	53.5714	89.2857	35.7143	1	-3		n	16									n (pairs)	16
7	00007		Female	162	67	83	4	Moderate	Moderate	Mild	Moderate	Moderate	Mild	Mild	11	60.7143	85.7143	25	2	-2		Mean	72.3214									Mean Pre KOOS JR (paired subset)	49.2857
8	00008		Male	173	72	60	2	Severe	Moderate	Moderate	Moderate	Moderate	Moderate	Moderate	15	46.4286	53.5714	7.14286	6	4		SD	16.6752									Mean Post KOOS JR (paired subset)	72.3214
9	00009		Female	127	63	70	4	Severe	Moderate	Moderate	Severe	Mild	Moderate	Moderate	15	46.4286	71.4286	25	1	-3												Mean change (Post - Pre)	26.1161
10	00010		Male	174	72	64	5	Severe	Severe	Severe	Moderate	Severe	Severe	Severe	20	28.5714	35.7143	7.14286	5	0												SD of change	20.5667
11	00011		Male	205	72	80	1	Mild	Mild	None	Moderate	None	Moderate	Mild	7	75	89.2857	14.2857	0	-1		Unpaired KOOS JR (0-100) Pre vs Post										Paired t-statistic	5.07928
12	00012		Female	125	65	49	5	Moderate	Moderate	Mild	Severe	Mild	Moderate	Moderate	13	53.5714						Difference in means (Post - Pre)	23.0357									Degrees of freedom	15
13	00013		Female	177	65	64	3	Moderate	Mild	Mild	Moderate	Mild	Mild	Mild	9	67.8571	75	7.14286	2	-1		t-statistic (Welch, unpaired)	4.19933									p-value (two-tailed, paired)	0.000135869
14	00014		Female	232	65	63	7	Severe	Severe	Moderate	Severe	Moderate	Moderate	Moderate	17	39.2857						df (Welch)	33.7007
15	00015		Male	228	70	77	5	Severe	Moderate	Moderate	Severe	Mild	Moderate	Moderate	15	46.4286	78.5714	32.1429	3	-2		p-value (two-tailed, Welch)	0.000190425
16	00016		Female	156	64	57	3	Severe	Severe	Moderate	Moderate	Severe	Severe	Severe	19	32.1429	75	42.8571	1	-2		p-value (T.TEST, unequal var)	0.000184602									Paired subset means
17	00017		Female	138	66	65	5	Severe	Severe	Moderate	Severe	Moderate	Severe	Moderate	18	35.7143																Timepoint	Mean KOOS JR (0–100)
18	00018		Male	161	70	59	6	Extreme	Moderate	Moderate	Moderate	Moderate	Severe	Moderate	17	39.2857	53.5714	14.2857	2	-4												Pre (paired)	49.2857
19	00019		Female	234	65	67	2	None	Mild	Mild	Moderate	Mild	Mild	Moderate	8	71.4286	71.4286	0	2	0												Post (paired)	72.3214
20	00020		Male	197	70	72	4	Moderate	Moderate	Moderate	Severe	Moderate	Moderate	Mild	14	50	75	25	1	-3		Paired KOOS JR (0-100) using Unique ID
21	00021		Female	139	64	57	4	Mild	None	Moderate	Mild	None	None	None	4	85.7143						n (pairs)	16
22	00022		Female	170	64	77	10	Extreme	Extreme	Extreme	Extreme	Extreme	Extreme	Extreme	28	0	85.7143	85.7143	1	-9		Mean Pre (paired)	49.2857									Table 1. Numerical pain scores (0–10) pre- and postintervention
23	00023		Female	234	63	75	3	Moderate	Mild	Mild	Mild	Mild	Moderate	Moderate	10	64.2857						Mean Post (paired)	72.3214									Group	n	Mean pain (0–10)	SD
24	00024		Female	178	66	71	3	Moderate	Moderate	Mild	Moderate	Moderate	Moderate	Severe	14	50	92.8571	42.8571	2	-1		Mean Difference (Post-Pre)	26.1161									Preintervention (all patients)	25	4.6	2.41523
25	00025		Female	204	67	75	7	Moderate	Severe	Mild	Moderate	Mild	Moderate	Severe	14	50						SD Difference	20.5667									Postintervention (all patients)	16	1.9375	1.56924
																						t-statistic (paired)	5.07928									Paired cohort (patients with both pre and post pain scores)	16	-2.5	3.18329
Post KOOS JR Calculations																						df	15
Post_RowIndex	Post_ID		Post_Gender	Weight	Inches	Age	PainScore_0_10_Post	Stiffness_1	Pain_1	Pain_2	Pain_3	Pain_4	Function_1	Function_2	KOOSJR_Raw_Post	KOOSJR_0_100_Post						p-value (two-tailed, paired)	0.000135869
1	00004		Male	183	70	57	1	Mild	Mild	Mild	Moderate	None	Mild	None	6	78.5714
2	00007		Female	162	67	83	2	Mild	Mild	Mild	Mild	None	None	None	4	85.7143
3	00020		Male	197	70	72	1	Mild	Mild	Mild	Mild	Mild	Mild	Mild	7	75
4	00013		Female	177	65	64	2	Moderate	Mild	None	Mild	Mild	Mild	Mild	7	75						Numerical Pain Score (0–10) Summary
5	00005		Female	189	65	75	1	Moderate	Moderate	Moderate	Moderate	Moderate	Moderate	Severe	15	46.4286						Pre pain n	25
6	00015		Male	228	70	77	3	Mild	None	Mild	Mild	Mild	Mild	Mild	6	78.5714						Pre pain mean	4.6
7	00019		Female	234	65	67	2	Mild	Mild	Mild	Mild	Mild	Mild	Moderate	8	71.4286						Pre pain SD	2.41523
8	00006		Female	155	68	57	1	None	Mild	None	Mild	None	Mild	None	3	89.2857
9	00018		Male	161	70	59	2	Moderate	Moderate	Mild	Moderate	Moderate	Moderate	Moderate	13	53.5714						Post pain n	16
10	00008		Male	173	72	60	6	Moderate	Severe	Moderate	Mild	Moderate	Moderate	Mild	13	53.5714						Post pain mean	1.9375
11	00009		Female	127	63	70	1	Mild	Mild	Mild	Moderate	None	Moderate	Mild	8	71.4286						Post pain SD	1.56924
12	00016		Female	156	64	57	1	Mild	Mild	Mild	Mild	Mild	Mild	Mild	7	75
13	00024		Female	178	66	71	2	Mild	None	None	Mild	None	None	None	2	92.8571						Unpaired numerical pain (Pre vs Post)
14	00011		Male	205	72	80	0	Mild	Mild	None	None	None	Mild	None	3	89.2857						Difference in means (Post - Pre)	-2.6625
15	00010		Male	174	72	64	5	Moderate	Moderate	Moderate	Severe	Moderate	Severe	Extreme	18	35.7143						t-statistic (Welch, unpaired)	-4.27858
16	00022		Female	170	64	77	1	Mild	Mild	Mild	Mild	None	None	None	4	85.7143						df (Welch)	38.9729
																						p-value (two-tailed, Welch)	0.000122522
																						p-value (T.TEST, unequal var)	0.000118138
																						Paired numerical pain (0–10) using Unique ID
																						n (pairs)	16
																						Mean Pre pain (paired)	4.6
																						Mean Post pain (paired)	1.9375
																						Mean Difference (Post - Pre)	-2.5
																						SD Difference	3.18329
																						t-statistic (paired)	-3.1414
																						df	15
																						p-value (two-tailed, paired)	0.00672352
																						Weight (lbs)	Height (in)	Age (yrs)	BMI
																					Avg	174.48	66.6	66.84	27.6537
																					Std	34.0699	2.92973	9.68538

## Sheet: Summary
Table 1: Patient Characteristics
Demographic	Group
Age, y (SD)	66.8 (9.7)
BMI (SD)	27.7 (5.6)
Gender, n (%)
Male	7 (25%)
Female	18 (75%)
Table 2: Statistical Analyses
Variable	Metric	Mean Baseline (n=25)	Mean 12 Week (n=16)
Cryoneurolysis + RFA	Pain NRS	4.6	1.9
	(SD)	2.4	1.6
	KOOS JR	49.3	72.3
	(SD)	17.8	16.7
Table 3: Pain NRS t-tests
Variable	Metric	Mean Difference	t-statistic	df	p-value
Cryoneurolysis + RFA	Paired test	-2.5	-3.14	15	0.00672
	Unpaired test	-2.66	-4.27	38.9	0.00012
Table 4: KOOS JR t-tests
Variable	Metric	Mean Difference	t-statistic	df	p-value
Cryoneurolysis + RFA	Paired test	26.12	5.07	15	0.00013
	Unpaired test	23.04	4.2	33.7	0.00018
Notes:
RFA = Radiofrequency ablation
NRS = Pain numerical rating score (0-10)
KOOS JR = Knee Injury and Osteoarthritis Outcomes Score Joint Replacement
df = Degrees of freedom
All statistical tests performed at α = 0.05
Paired tests compare within-patient changes (n=16 pairs)
Unpaired tests (Welch's t-test) compare all available data (n=25 pre, n=16 post)
