# Supplementary material
Source: Research Square preprint supplement (doi:10.21203/rs.3.rs-8888424/v1)
Supplement: Supplementary file 1 [file c4dafb50a3cfbf289d6654d7.docx]

| **Table 1:**  Patient characteristics of cryoneurolysis treatment group | |
| --- | --- |
| **Demographic** | **Group** |
| Age, y (SD) | 66.8 (9.7) |
| BMI (SD) | 27.7 (5.6) |
| Gender, n (%) |  |
| Male | 7 (25%) |
| Female | 18 (75%) |
| Values are mean (standard deviation) unless otherwise specified. SD, standard deviation. | |

| **Table 2:**  Statistical Analyses | | | | |
| --- | --- | --- | --- | --- |
| **Variable** | **Metric** | **Mean Baseline (n = 25)** | **Mean 12 Week (n = 16)** |  |
| Cryoneurolysis + RFA | Pain NRS | 4.6 (2.4) | 1.9 (1.6) |  |
| KOOS JR | 49.3 (17.8) | 72.3 (16.7) |  |
| Values are mean (standard deviation) unless otherwise specified. RFA, Radiofrequency ablation; NRS, pain numerical rating score (0-10); KOOS JR, Knee Injury and Osteoarthritis Outcomes Score Joint Replacement. | | | | |

| **Table 3:**  Pain NRS t-tests | | | | | |
| --- | --- | --- | --- | --- | --- |
| **Variable** | **Metric** | **Mean Difference** | **t-statistic** | **df** | **p-value** |
| Cryoneurolysis + RFA | Paired test | -2.50 | -3.14 | 15 | 0.00672 |
| Unpaired test | -2.66 | -4.27 | 38.9 | 0.00012 |
| NRS, pain numerical rating score (0-10); RFA, Radiofrequency ablation; df, degrees of freedom. | | | | | |

| **Table 4:**  KOOS JR t-tests | | | | | |
| --- | --- | --- | --- | --- | --- |
| **Variable** | **Metric** | **Mean Difference** | **t-statistic** | **df** | **p-value** |
| Cryoneurolysis + RFA | Paired test | 26.1 | 5.07 | 15 | 0.00014 |
| Unpaired test | 23.0 | 4.20 | 33.7 | 0.00018 |
| KOOS JR, Knee Injury and Osteoarthritis Outcomes Score Joint Replacement; RFA, Radiofrequency ablation; df, degrees of freedom. | | | | | |
